# Supplementary material
Source: ML conference proceedings conference paper supplement (https://proceedings.mlr.press/v164/kalashnikov22a.html)
Supplement: Supplementary file 2 [file kalashnikov22a-supp.zip]

Archive with 2 entries (1 files):
- corl_supplemental/
- corl_supplemental/multi_task_CoRL (2)-13-19.pdf
